# Supplementary material for: A Novel DNA Variant in SMARCA4 Gene Found in a Patient Affected by Early Onset Colon Cancer
Source: MDPI journal article supplement (doi:10.3390/ijms25052716), 2024-02-27
Supplement: s1 [file s1]

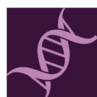

## Supplementary Materials

# A Novel DNA Variant in *SMARCA4* Gene Found in a Patient Affected by Early Onset Colon Cancer

Federica Di Maggio <sup>1,2,†</sup>, Giuseppe Boccia <sup>3,†</sup>, Marcella Nunziato <sup>1,2</sup>, Marcello Filotico <sup>3</sup>,  
Vincenzo Montesarchio <sup>4</sup>, Maria D'Armiento <sup>5</sup>, Francesco Corcione <sup>3,\*</sup> and Francesco Salvatore <sup>1,2,\*</sup>

<sup>1</sup> CEINGE-Biotecnologie Avanzate Franco Salvatore, 80145 Naples, Italy; dimaggio@ceinge.unina.it (F.D.M.); nunziato@ceinge.unina.it (M.N.)

<sup>2</sup> Department of Molecular Medicine and Medical Biotechnologies, University of Naples "Federico II", 80131 Naples, Italy

<sup>3</sup> Department of Public Health, University of Naples "Federico II", 80131 Naples, Italy; giuseppe.boccia@unina.it (G.B.); dottmarcellofilotico@gmail.com (M.F.)

<sup>4</sup> Division of Medical Oncology, AORN dei Colli-Monaldi Hospital, 80131 Naples, Italy; vincenzo.montesarchio@ospedaleiccolli.it

<sup>5</sup> Pathology Unit, Department of Public Health, University of Naples "Federico II", 80131 Naples, Italy; maria.darmiento@unina.it

\* Correspondence: francesco.corcione@clinicamediterranea.it (F.C.); salvator@unina.it (F.S.)

† These authors contributed equally to this work.

**Supplementary Table S1.** Composition of Advanced +++ medium

| Product            | Catalogue Number | Product Concentration |
|--------------------|------------------|-----------------------|
| Advanced DMEM/F-12 | 12634010         | up to 50 mL           |
| Primocin           | ant-pm-2         | 50 mg/ml              |
| Hepes (1M)         | 15630-080        | 100x                  |
| Glutamax           | 35050061         | 100x                  |

**Supplementary Table S2.** Composition of Cell culture medium

| Reagent          | Concentration | Catalogue Number |
|------------------|---------------|------------------|
| A83-01           | 0,025 mM      | 2939             |
| mEGF             | 0,05 µg/ml    | PMG8043          |
| Gastrin          | 0,1 µM        | 1003377          |
| mNoggin          | 0,1 µg/mL     | 250-38           |
| IGF-I            | 0,1 µg/mL     | 100-11           |
| N-acetylcysteine | 1,25 mM       | A9165            |
| Nicotinamide     | 10 mM         | N0636-100G       |
| B27 supplement   | 1 µl/mL       | 17504044         |
| Advanced +++     | up to 50 mL   |                  |
